# Supplementary material for: Effects of blue and/or red light on conidial release, conidiophore morphology, and colony development in strawberry powdery mildew
Source: Research Square preprint supplement (doi:10.21203/rs.3.rs-7498601/v1), 2025-09-03
Supplement: Supplementary file 1 [file 6cec5e672380aa521c99ef56.xlsx]

## Sheet: Sheet1
	Table 2 Effects of light quality on colony development of the strawberry powdery mildew isolate KSP-7N
	Conditons for incubation	Germination rates (%)		Hyphal lengths (mm)		Colony areas (mm2)		The number of conidiophores		The number of conidia collected		Germination rates (%)
	Blue lights	35.7 ± 3.7	a	0.83 ± 0.25	a	16.4 ± 3.7	ab	455.3 ± 89.5	ab	817.6 ± 59.6	a	2.1 ± 1.0	b
	Red lights	40.3 ± 4.2	a	0.25 ± 0.10	b	1.0 ± 0.2	c	74.2 ± 9.7	c	26.2 ± 9.2	c	1.4 ± 1.2	b
	Blue + Red lights	38.3 ± 3.3	a	0.75 ± 0.19	a	14.4 ± 2.1	ab	422.8 ± 77.8	ab	759.4 ± 57.7	ab	2.4 ± 1.4	b
	Natural lights	33.6 ± 2.9	a	0.75 ± 0.12	a	17.5 ± 3.4	a	485.2 ± 73.1	a	819.6 ± 92.9	a	19.0 ± 5.2	a
	White lights	31.0 ± 4.8	a	0.65 ± 0.10	a	11.0 ± 2.1	b	363.0 ± 33.6	b	658.8 ± 51.5	b	20.2 ± 2.3	a
	Darkness	32.7 ± 4.3	a	0.24 ± 0.02	b	1.3 ± 0.3	c	51.8 ± 18.1	c	16.2 ± 5.7	c	0	c
	Different letters in each column indicate significant differences (p < 0.05, Tukey's test).
