# Supplementary material for: Effects of blue and/or red light on conidial release, conidiophore morphology, and colony development in strawberry powdery mildew
Source: Research Square preprint supplement (doi:10.21203/rs.3.rs-7498601/v1), 2025-09-03
Supplement: Supplementary file 2 [file b9cd09c4cde8f894a064c17a.xlsx]

## Sheet: Sheet1
	Table 3 Development of P. aphanis KSP-7N colonies on strawberry seedlings pre-irradiated with blue or red light
	Conditons prior to inoculation	Conditons after inoculation	Colony areas (mm2)
	Blue lights	White lights	13.2 ± 3.0	b
		Natural lights	22.7 ± 2.4	a
	Red lights	White lights	6.4 ± 2.5	c
		Natural lights	10.1 ± 3.3	bc
	Natural lights	White lights	12.5 ± 2.4	b
	White lights	Natural lights	21.0 ± 3.2	a
	Different letters in each column indicate significant differences (p < 0.05, Tukey's test)
