# Supplementary material for: Effects of blue and/or red light on conidial release, conidiophore morphology, and colony development in strawberry powdery mildew
Source: Research Square preprint supplement (doi:10.21203/rs.3.rs-7498601/v1), 2025-09-03
Supplement: Supplementary file 3 [file f5ecce4171c34d9c69c2e27e.xlsx]

## Sheet: Sheet1
	Table 1 Numbers and germination rates of conidia collected electrostatically from single P. aphanis KSP-7N colonies under blue and/or red LED light irradiation
	Conditons for incubation	The number of conidia collected		Germination rates (%)
	Blue lights	522.8 ± 33.6	a	14.8 ± 4.1	a
	Red lights	91.8 ± 42.8	b	4.8 ± 2.3	b
	Blue + Red lights	528.2 ± 140.0	a	16.9 ± 6.1	a
	Natural lights	574.0 ± 138.8	a	18.9 ± 4.3	a
	White lights	465.8 ± 133.1	a	19.2 ± 3.7	a
	Darkness	59.0 ± 13.4	b	3.5 ± 2.9	b
	Different letters in each column indicate significant differences (p < 0.05, Tukey's test).
